# Supplementary material
Source: PubMed Central journal article supplement (PMC10203971)
Supplement: jamainternmed-e231245-s001.pdf [file jamainternmed-e231245-s001.pdf]

## Supplemental Online Content

Feldman WB, Avorn J, Kesselheim AS, Gagne JJ. Chronic obstructive pulmonary disease exacerbations and pneumonia hospitalizations among new users of combination maintenance inhalers. *JAMA Intern Med.* Published online May 22, 2023. doi:10.1001/jamainternmed.2023.1245

### eMethods

**eTable 1.** Key Randomized Controlled Trials Comparing LAMA-LABA to ICS-LABA Therapy in COPD

**eTable 2.** Inhalers in the Exposure and Referent Groups

**eTable 3.** Identification of Oral Antibiotics Used to Treat COPD Exacerbations

**eTable 4.** Reasons for Censoring in the Primary Effectiveness Analysis

**eTable 5.** Reasons for Censoring in the Primary Safety Analysis

**eFigure 1.** Study Design Comparing New LAMA-LABA Users to ICS-LABA Users

**eFigure 2.** Cohort Composition

**eFigure 3.** Propensity Score Distributions Before and After Matching

**eFigure 4.** Sensitivity Analysis for the Incidence of First Moderate COPD Exacerbation

**eFigure 5.** Sensitivity Analysis for the Incidence of First Severe COPD Exacerbation

**eFigure 6.** Sensitivity Analysis for Subgroup Comparison of First Moderate or Severe COPD Exacerbation Based on Eosinophil Level

**eFigure 7.** Subgroup Analysis for the Incidence of First Pneumonia Hospitalization

**eFigure 8.** Incidence of First Moderate or Severe COPD Exacerbation by Type of ICS-LABA

**eFigure 9.** Incidence of First Pneumonia Hospitalization by Type of ICS-LABA

### eReferences

This supplemental material has been provided by the authors to give readers additional information about their work.

## eMethods

*Eosinophil levels:* The cutoffs chosen for analysis were 100 cells/microliter and 300 cells/microliter based on the GOLD guidelines, which use these cutoffs to identify patients' likelihood of response to inhaled corticosteroids.<sup>1,2</sup> We excluded patients with a most recent eosinophil count > 5,000 cells/microliter in our primary analysis (the lower limit of severe eosinophilia) to avoid including patients with potential myeloproliferative hypereosinophilic disorders. On prespecified sensitivity analysis, we used different upper bounds of eosinophil levels, including the upper bound of 600 cells/microliter used in the FLAME trial,<sup>3</sup> an upper bound of 1,500 cells/microliter (the lower limit of moderate eosinophilia), and no upper bound.

*Sensitivity analyses:* We altered our primary analysis by shortening the grace period permitted between prescription fills to 30 days, lengthening it to 90 days, and performing an intention-to-treat analysis. On the intention-to-treat analysis, we followed patients for up to a year until death or the end of insurance coverage, regardless of whether they discontinued, switched, or added therapy during follow-up. We examined the effect of excluding outcomes of interest in the first 30 days and first 60 days after cohort entry to account for a potential lag in the effects of inhaler therapy, and we altered the follow-up time (shortened to 180 days and lengthened to 720 days) to account for potential attenuation or augmentation of effects over time. We also studied the effect of altering the definition of severe COPD exacerbation by requiring that patients have a specific exacerbation diagnosis code (*International Classification of Diseases, Ninth Revision, Clinical Modification* [ICD-9-CM] 491.21 or 491.22 or *International Classification of Diseases, Tenth*

*Revision, Clinical Modification [ICD-10-CM] J44.0 or J44.1*) in any position. We altered the definition of moderate COPD exacerbations by requiring a 30-day gap (rather than 14-day gap) between a new prednisone fill and the last prednisone fill or COPD hospitalization and, in a separate sensitivity analysis, by requiring an emergency department visit or office visit for COPD within 5 days of the prednisone fill. In further post-hoc sensitivity analyses, we modified the definition of moderate exacerbation to include prescription fills of either prednisone or antibiotics; we also performed a sensitivity analysis in which moderate exacerbations were defined by fills of both prednisone and antibiotics on the same day. We altered the definition of pneumonia hospitalization by requiring that a pneumonia diagnosis appear in the primary position. We performed sensitivity analyses using 1:1 high-dimensional propensity score matching<sup>4-6</sup> and post-hoc sensitivity analyses adjusting for deciles of propensity score (both untrimmed and trimmed [2.5%, asymmetric method]).

*High-dimensional propensity score matching:* To perform high-dimensional propensity score matching, we used data for *ICD-9-CM* and *ICD-10-CM* diagnosis codes and procedure codes for inpatient confinements and medical services, Current Procedure Terminology codes for medical services, and prescription drug claims (based on National Drug Code generic name).

*Outcome definitions:* The outcome definitions used in our study had the following positive predictive values in previous validation studies: moderate COPD exacerbation, 0.73;<sup>7</sup> severe COPD exacerbation, 0.85;<sup>8</sup> and pneumonia hospitalization, 0.88.<sup>9</sup> Note that the validation study of moderate COPD exacerbations was conducted in the United Kingdom and was based on prescriptions in the electronic medical record rather than on prescriptions filled at the pharmacy.

The validation studies for severe COPD exacerbation and pneumonia hospitalization were conducted in the US based on claims with *ICD-9-CM codes*. To construct outcome definitions in our study, we converted *ICD-9-CM* codes to *ICD-10-CM* codes based on clinical review.

**eTable 1. Key Randomized Controlled Trials Comparing LAMA-LABA to ICS-LABA Therapy in COPD**

| Key trials           | Summary of findings                                                                                                                  | Key endpoints                                                           | Event rates |           |
|----------------------|--------------------------------------------------------------------------------------------------------------------------------------|-------------------------------------------------------------------------|-------------|-----------|
|                      |                                                                                                                                      |                                                                         | ICS-LABA    | LAMA-LABA |
| FLAME <sup>3</sup>   | LAMA-LABA therapy was associated with lower rates of COPD exacerbations and pneumonia hospitalizations compared to ICS-LABA therapy. | Annual rate of all COPD exacerbations (primary endpoint)                | 4.03        | 3.59      |
|                      |                                                                                                                                      | Annual rate of moderate or severe COPD exacerbations <sup>a</sup>       | 1.19        | 0.98      |
|                      |                                                                                                                                      | Time to first COPD exacerbation, days <sup>a</sup>                      | 51          | 71        |
|                      |                                                                                                                                      | Time to first moderate or severe COPD exacerbation, days <sup>a</sup>   | 87          | 127       |
|                      |                                                                                                                                      | Incidence of pneumonia, %                                               | 4.8         | 3.2       |
| IMPACT <sup>10</sup> | LAMA-LABA therapy was associated with higher rates of COPD exacerbations compared to ICS-LABA therapy but lower rates of pneumonia.  | Annual rate of moderate or severe COPD exacerbations (primary endpoint) | 1.07        | 1.21      |
|                      |                                                                                                                                      | Annual rate of pneumonia episodes per 1,000 person-years                | 96.6        | 61.2      |
| ETHOS <sup>11</sup>  | LAMA-LABA therapy was associated with higher rates of COPD exacerbations compared to ICS-LABA therapy but lower rates of pneumonia.  | Annual rate of moderate or severe COPD exacerbations (primary endpoint) | 1.24        | 1.42      |
|                      |                                                                                                                                      | Annual rate of pneumonia episodes per 1,000 person-years                | 63.8        | 37.3      |

FLAME: Effect of Indacaterol Glycopyrronium vs. Fluticasone Salmeterol on COPD Exacerbations; IMPACT: Informing the Pathway of COPD Treatment; ETHOS: Efficacy and Safety of Triple Therapy in Obstructive Lung Disease; ICS: inhaled corticosteroid; LABA: long-acting beta agonist; LAMA: long-acting muscarinic antagonist; COPD: chronic obstructive pulmonary disease; CI: confidence interval

a. All secondary analyses in FLAME were reported in the modified intention to treat population.

**eTable 2. Inhalers in the exposure and referent groups**

| <b>LAMA-LABA (exposure)</b> |                    | <b>ICS-LABA (referent)</b> |                                |
|-----------------------------|--------------------|----------------------------|--------------------------------|
| <i>Generic name</i>         | <i>Brand-name</i>  | <i>Generic name</i>        | <i>Brand name</i>              |
| acclidinium-formoterol      | Duaklir Pressair   | budesonide-formoterol      | Symbicort                      |
| glycopyrronium-formoterol   | Bevespi Aerosphere | fluticasone-salmeterol     | Advair Diskus                  |
| glycopyrronium-indacaterol  | Utibron Neohaler   | fluticasone-salmeterol     | Advair HFA                     |
| tiotropium-olodaterol       | Stiolto Respimat   | fluticasone-salmeterol     | AirDuo Respiclick <sup>a</sup> |
| umeclidinium-vilanterol     | Anoro Ellipta      | fluticasone-salmeterol     | Wixela Inhub                   |
|                             |                    | fluticasone-vilanterol     | Breo Ellipta                   |
|                             |                    | mometasone-formoterol      | Dulera                         |

LAMA: long-acting muscarinic antagonist; LABA: long-acting beta agonist; ICS: inhaled corticosteroid.  
a. The AirDuo Respiclick also has an authorized generic that is included in the analysis.

**eTable 3. Identification of Oral Antibiotics Used to Treat COPD Exacerbations<sup>a</sup>**

| Class                       | Antibiotics included                                                                  |
|-----------------------------|---------------------------------------------------------------------------------------|
| Aminopenicillin             | amoxicillin, amoxicillin-clavulanate, ampicillin, ampicillin-sulbactam                |
| Cephalosporins <sup>b</sup> |                                                                                       |
| Second generation           | cefaclor, cefprozil, cefuroxime                                                       |
| Third generation            | cefdinir, cefditoren, cefixime, cefpodoxime, ceftibuten                               |
| Fluoroquinolones            | ciprofloxacin, delafloxacin, gemifloxacin, levofloxacin, moxifloxacin, ofloxacin      |
| Ketolides                   | telithromycin                                                                         |
| Macrolides                  | azithromycin, clarithromycin, erythromycin                                            |
| Tetracyclines               | demeclocycline, doxycycline, minocycline, omadacycline, oxytetracycline, tetracycline |
| Other                       | trimethoprim-sulfamethoxazole                                                         |

a. Outpatient antibiotic treatment in COPD exacerbations is aimed at covering pathogens that are frequently isolated during exacerbations, including *Haemophilus influenzae*, *Moraxella catarrhalis*, *Streptococcus pneumoniae*, and *Pseudomonas aeruginosa*. To develop a list of antibiotics commonly used in COPD exacerbations, we first consulted guidelines from the Global Initiative for Chronic Obstructive Lung Disease (GOLD),<sup>1</sup> the American Thoracic Society/European Respiratory Society,<sup>12</sup> the American Family Physician,<sup>13</sup> *Annals of Internal Medicine* “In the Clinic,”<sup>14</sup> the United Kingdom National Institute for Health and Care Excellence guidelines,<sup>15</sup> the Johns Hopkins antibiotic guide,<sup>16</sup> and *UpToDate*.<sup>17</sup> We chose to include official guidelines (written for audiences in pulmonary medicine, family medicine, and internal medicine) and pocket/online guidelines to capture the gamut of choices that clinicians make when selecting antibiotics for COPD exacerbations. We identified all individual oral antibiotics explicitly mentioned in these guidelines. We then searched all clinical trials for outpatient COPD exacerbations that were referenced in each guideline for additional oral antibiotics that may not have been explicitly mentioned. The most recent Cochrane Review of antibiotics used to treat COPD exacerbations<sup>18</sup> and several other systematic reviews, meta-analyses, and pooled analyses<sup>19-26</sup> were included with this additional search. We grouped all drugs by class (using classes set out in the guidelines) and, for the sake of completeness, searched for other drugs in each class that were not explicitly mentioned in the guidelines or cited studies but still had an indication for respiratory conditions.<sup>17,27</sup> Oral antibiotics were excluded if they were not on the market during the study period, were not yet approved in the US, or were otherwise not available in the US. All intravenous agents were excluded.

b. No guidelines recommended 1<sup>st</sup> generation cephalosporins, and, while one 1<sup>st</sup> generation cephalosporin (cefalexin) was studied in a trial cited by the guidelines, we excluded 1<sup>st</sup> generation cephalosporins.

**eTable 4. Reasons for Censoring in the Primary Effectiveness Analysis**

| <b>Censoring reason</b>                                                     | <b>ICS-LABA, n (%)<br/>(n=30,216)<sup>a</sup></b> | <b>LAMA-LABA, n (%)<br/>(n=30,216)<sup>b</sup></b> |
|-----------------------------------------------------------------------------|---------------------------------------------------|----------------------------------------------------|
| Outcome                                                                     | 3,901 (12.9)                                      | 4,250 (14.1)                                       |
| Death or end of patient enrollment                                          | 2,465 (8.2)                                       | 2,852 (9.4)                                        |
| Start of exposure (LAMA-LABA or ICS-LABA) different from the index exposure | 441 (1.5)                                         | 819 (2.7)                                          |
| ICS or LAMA added or ICS-LAMA-LABA begun                                    | 4,264 (14.1)                                      | 2,166 (7.2)                                        |
| End of index exposure                                                       | 16,542 (54.8)                                     | 15,514 (51.3)                                      |
| Maximum follow-up time                                                      | 2,603 (8.6)                                       | 4,615 (15.3)                                       |

ICS: inhaled corticosteroid; LABA: long-acting beta agonist; LAMA: long-acting muscarinic antagonist.

a. Mean follow-up was 129.6 days in the ICS-LABA group.

b. Mean follow-up was 160.1 days in the LAMA-LABA group.



**eTable 5. Reasons for Censoring in the Primary Safety Analysis**

| <b>Censoring reason</b>                                                     | <b>ICS-LABA, n (%)<br/>(n=30,216)<sup>a</sup></b> | <b>LAMA-LABA, n (%)<br/>(n=30,216)<sup>b</sup></b> |
|-----------------------------------------------------------------------------|---------------------------------------------------|----------------------------------------------------|
| Outcome                                                                     | 1,201 (4.0)                                       | 1,177 (3.9)                                        |
| Death or end of patient enrollment                                          | 2,574 (8.5)                                       | 2,996 (9.9)                                        |
| Start of exposure (LAMA-LABA or ICS-LABA) different from the index exposure | 494 (1.6)                                         | 940 (3.1)                                          |
| ICS or LAMA added or ICS-LAMA-LABA begun                                    | 4,707 (15.6)                                      | 2,631 (8.7)                                        |
| End of index exposure                                                       | 17,988 (59.5)                                     | 16,835 (55.7)                                      |
| Maximum follow-up time                                                      | 3,252 (10.8)                                      | 5,637 (18.7)                                       |

ICS: inhaled corticosteroid; LABA: long-acting beta agonist; LAMA: long-acting muscarinic antagonist.

a. Mean follow-up was 139.5 days in the ICS-LABA group.

b. Mean-follow-up was 173.3 days in the LAMA-LABA group.

**eFigure 1. Study Design Comparing New LAMA-LABA Users to ICS-LABA Users**

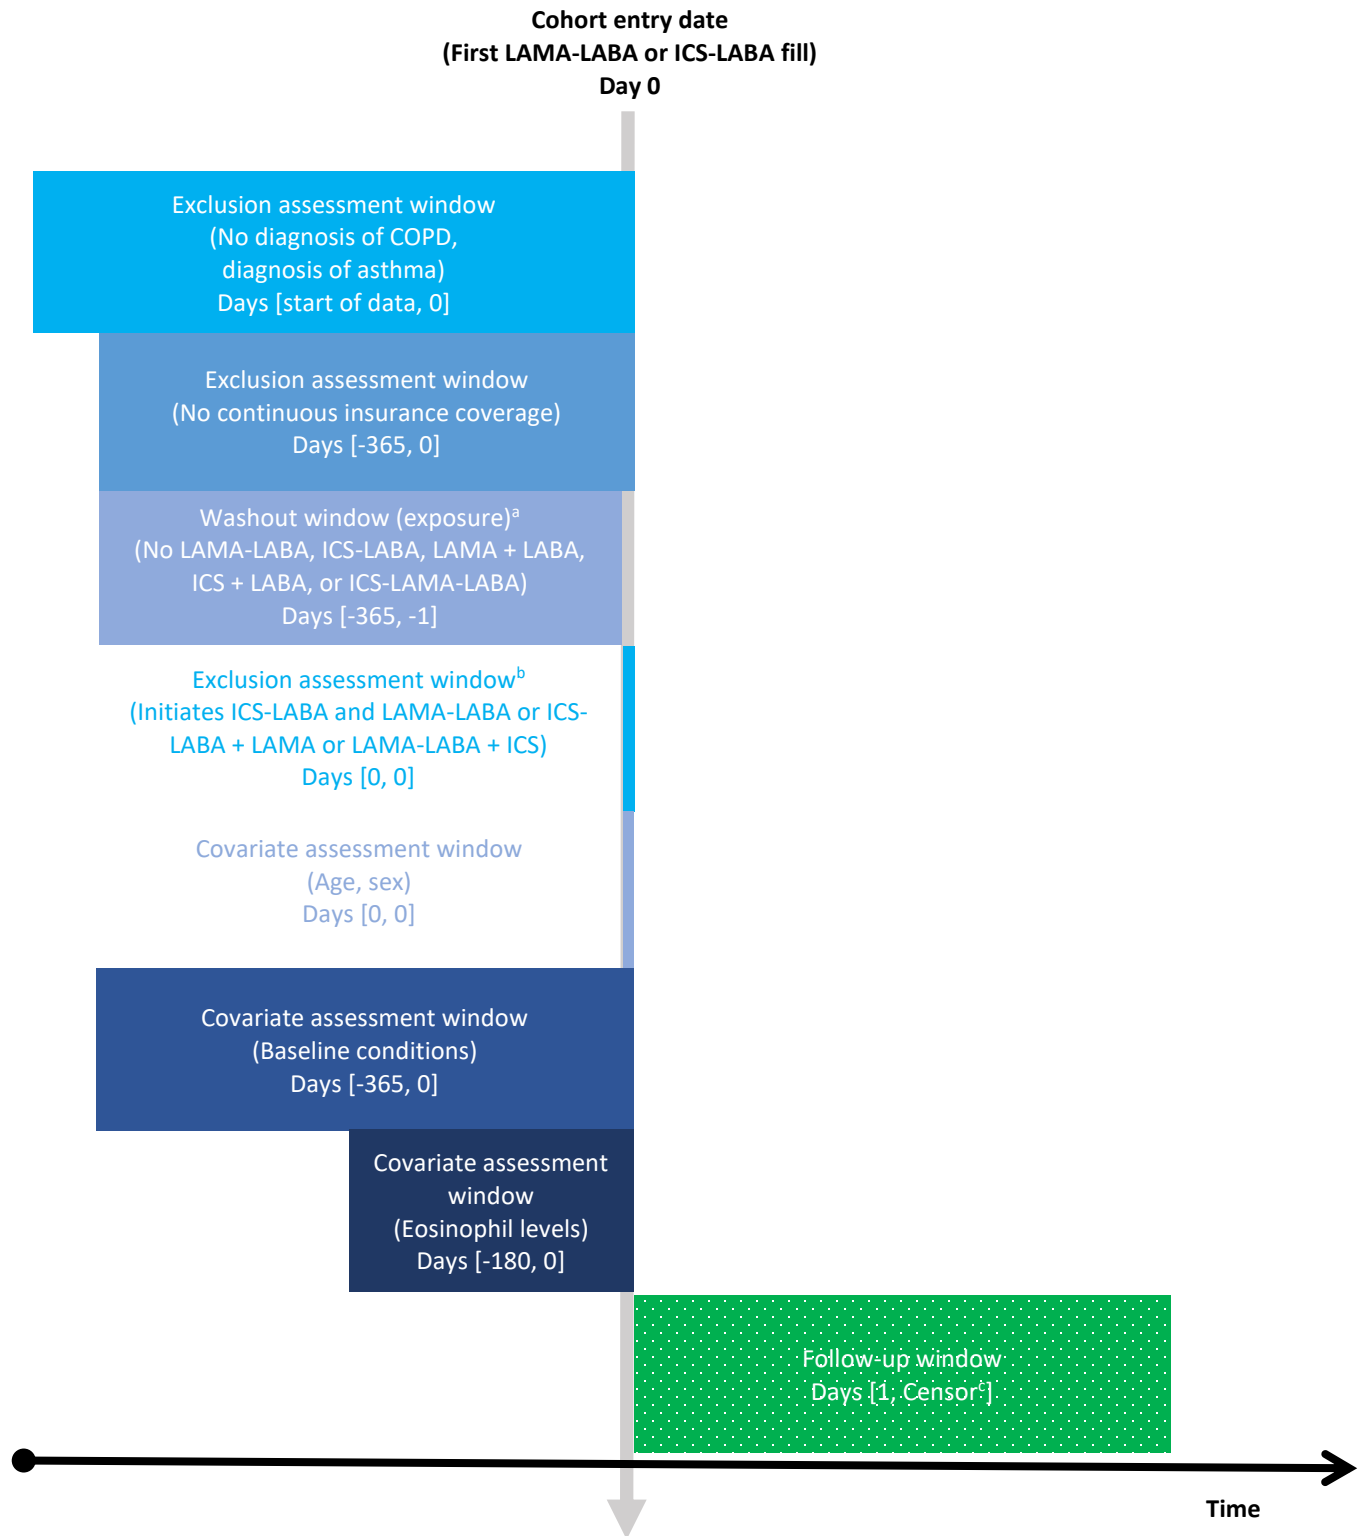

ICS: inhaled corticosteroid; LABA: long-acting beta agonist; LAMA: long-acting muscarinic antagonist. This graphical representation of study design shows how exclusion criteria were applied prior to cohort entry and how covariates were assessed.<sup>28</sup>

- a. During the washout-period, patients could not receive the exposure in combination form (LAMA-LABA) or via separate inhalers (LAMA + LABA). Likewise, the patient could not receive the referent in combination form (ICS-LABA) or via separate inhalers (LAMA + LABA). The definition of receiving dual therapy via separate inhalers was receiving one single-agent inhaler (e.g. ICS inhaler) within 30 days of another single-agent inhaler (e.g. LABA inhaler). Any patient receiving triple therapy (ICS-LAMA-LABA) during the washout period was also excluded.
- b. We excluded patients who initiated the exposure and referent on the same day and those who initiated triple therapy via separate inhalers on the cohort entry date (ICS-LABA + LAMA or LAMA-LABA + ICS).
- c. Censoring occurred at the earliest event among the following: discontinuation of treatment (with a 60-day grace period between prescription fills), switch from exposure to referent or vice-versa, the addition of an ICS or LAMA, initiation of an ICS-LAMA-LABA, death, or the end of insurance coverage.

**eFigure 2. Cohort Composition**

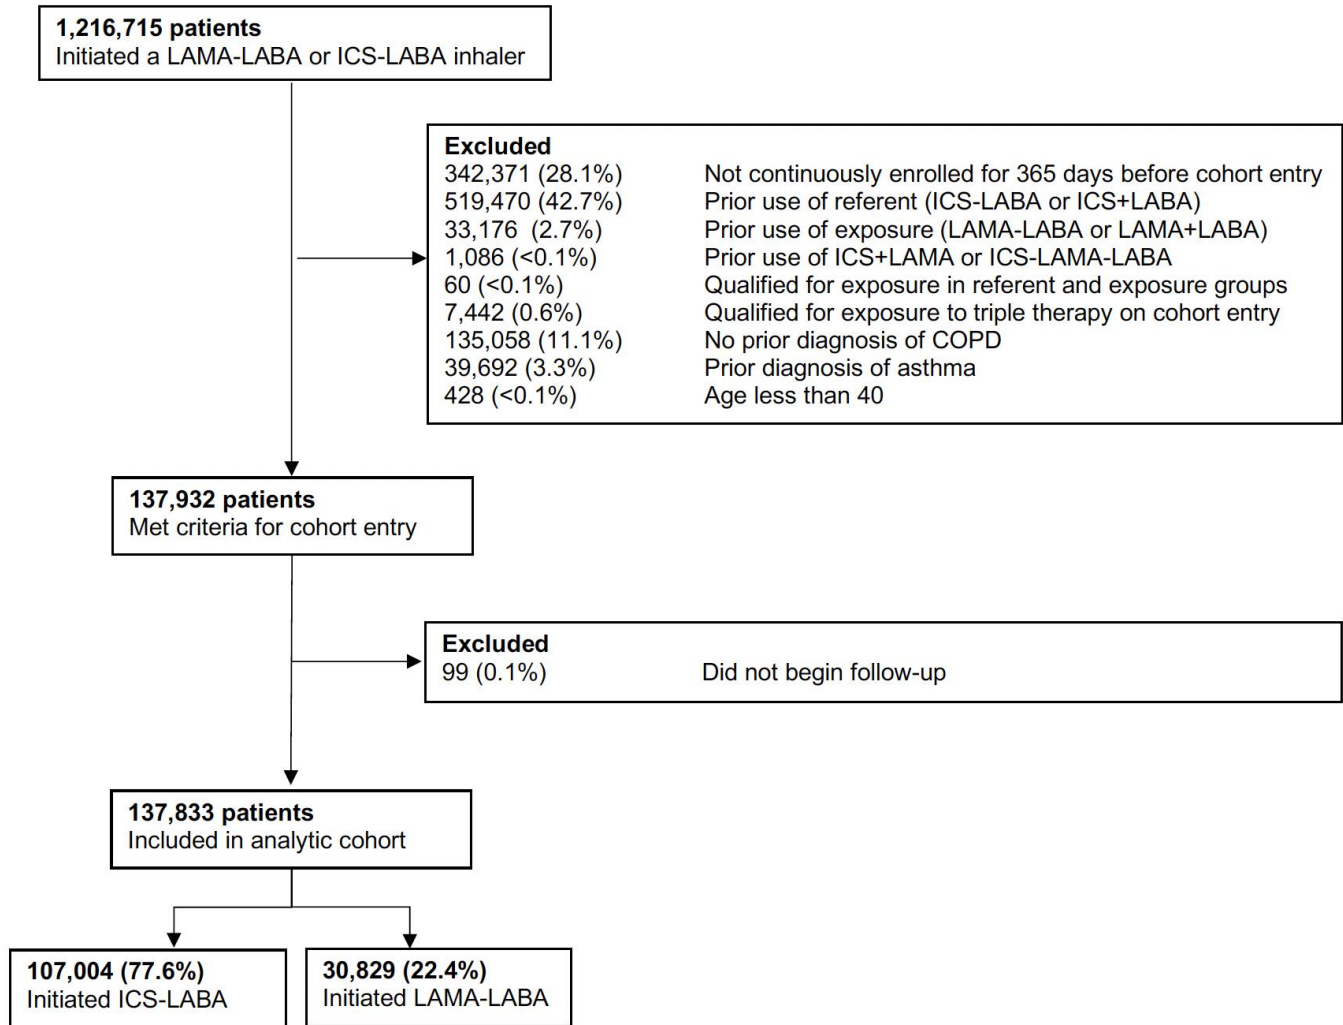

**eFigure 3. Propensity Score Distributions Before and After Matching**

**A:** Propensity score distributions before matching

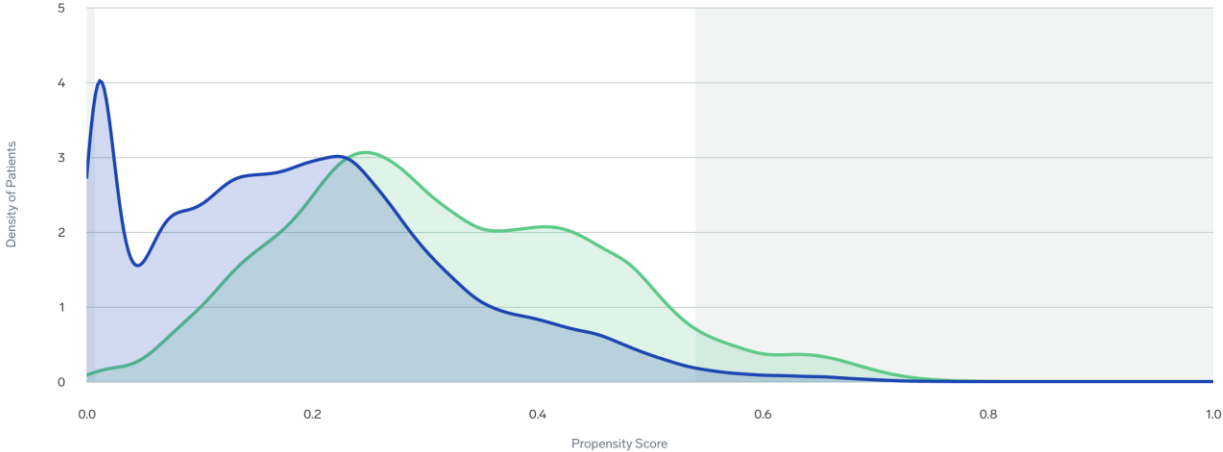

**B:** Propensity score distributions after matching

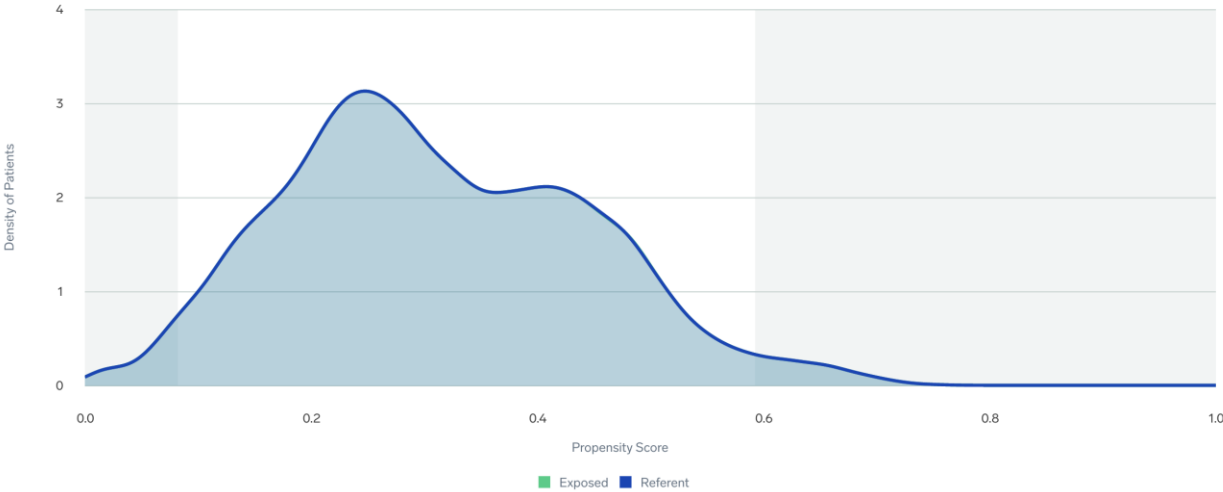

Panel A shows imbalance in the covariates in our propensity score model before matching, while Panel B shows balance in these covariates after matching.

**eFigure 4. Sensitivity Analysis for the Incidence of First Moderate COPD Exacerbation**

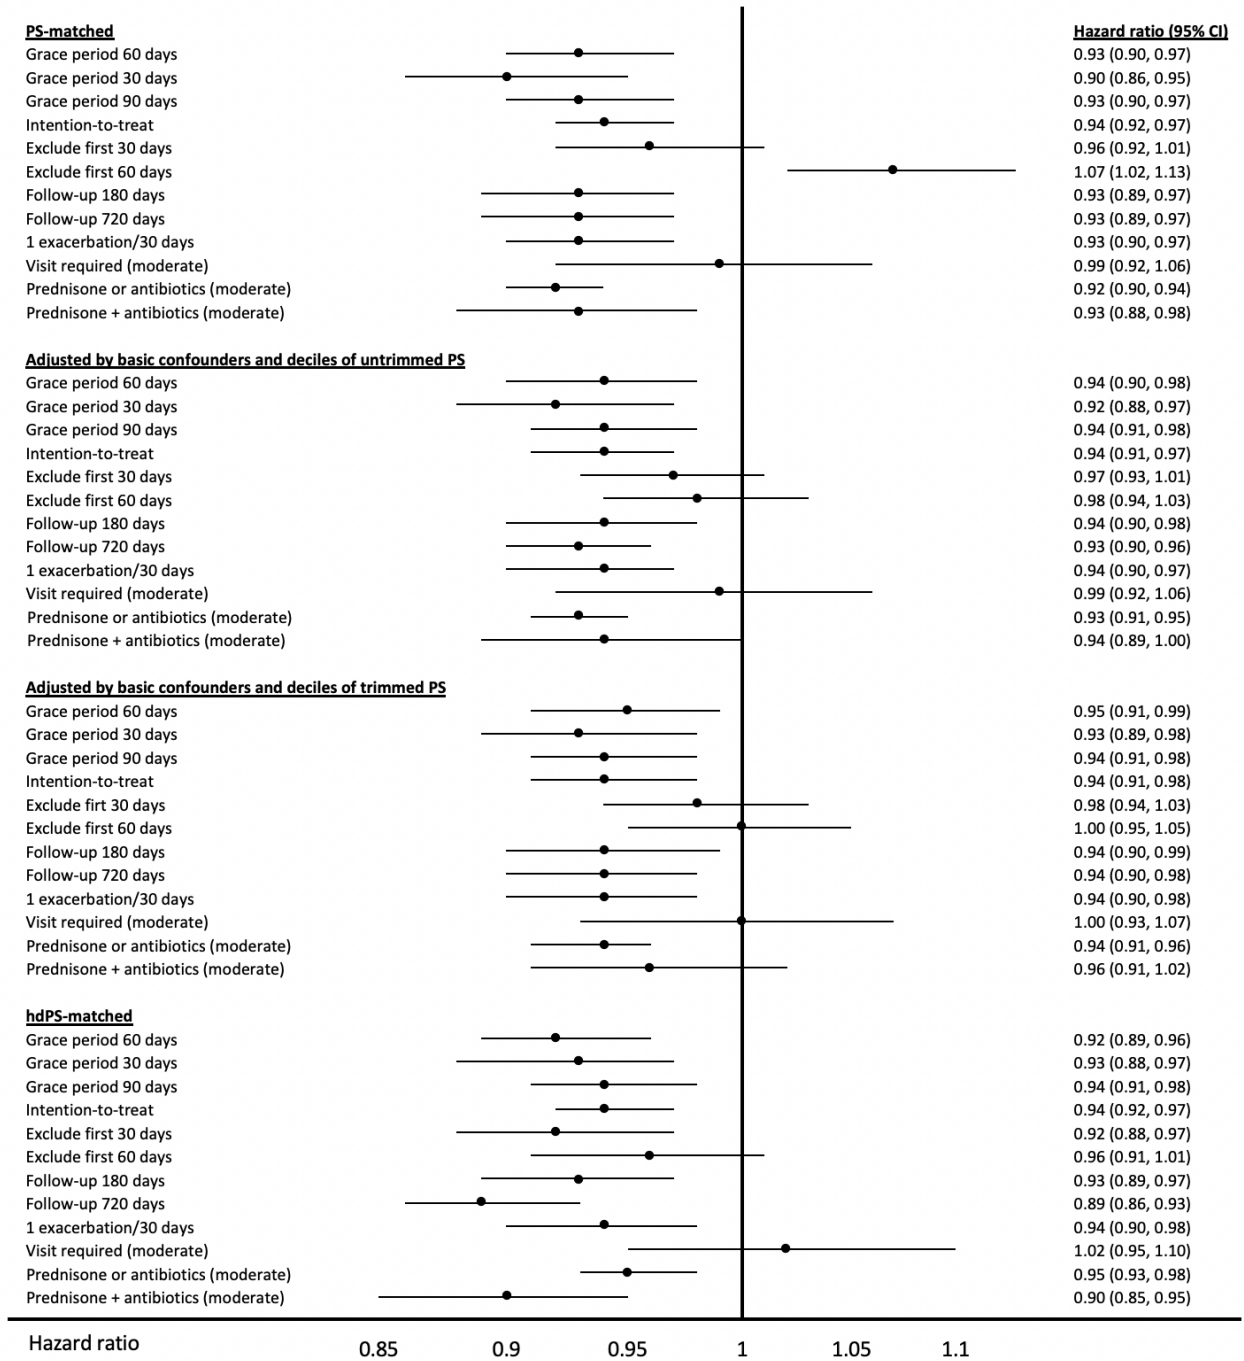

CI: confidence interval; PS: propensity score; hdPS: high-dimensional propensity score.

**eFigure 5. Sensitivity Analysis for the Incidence of First Severe COPD Exacerbation**

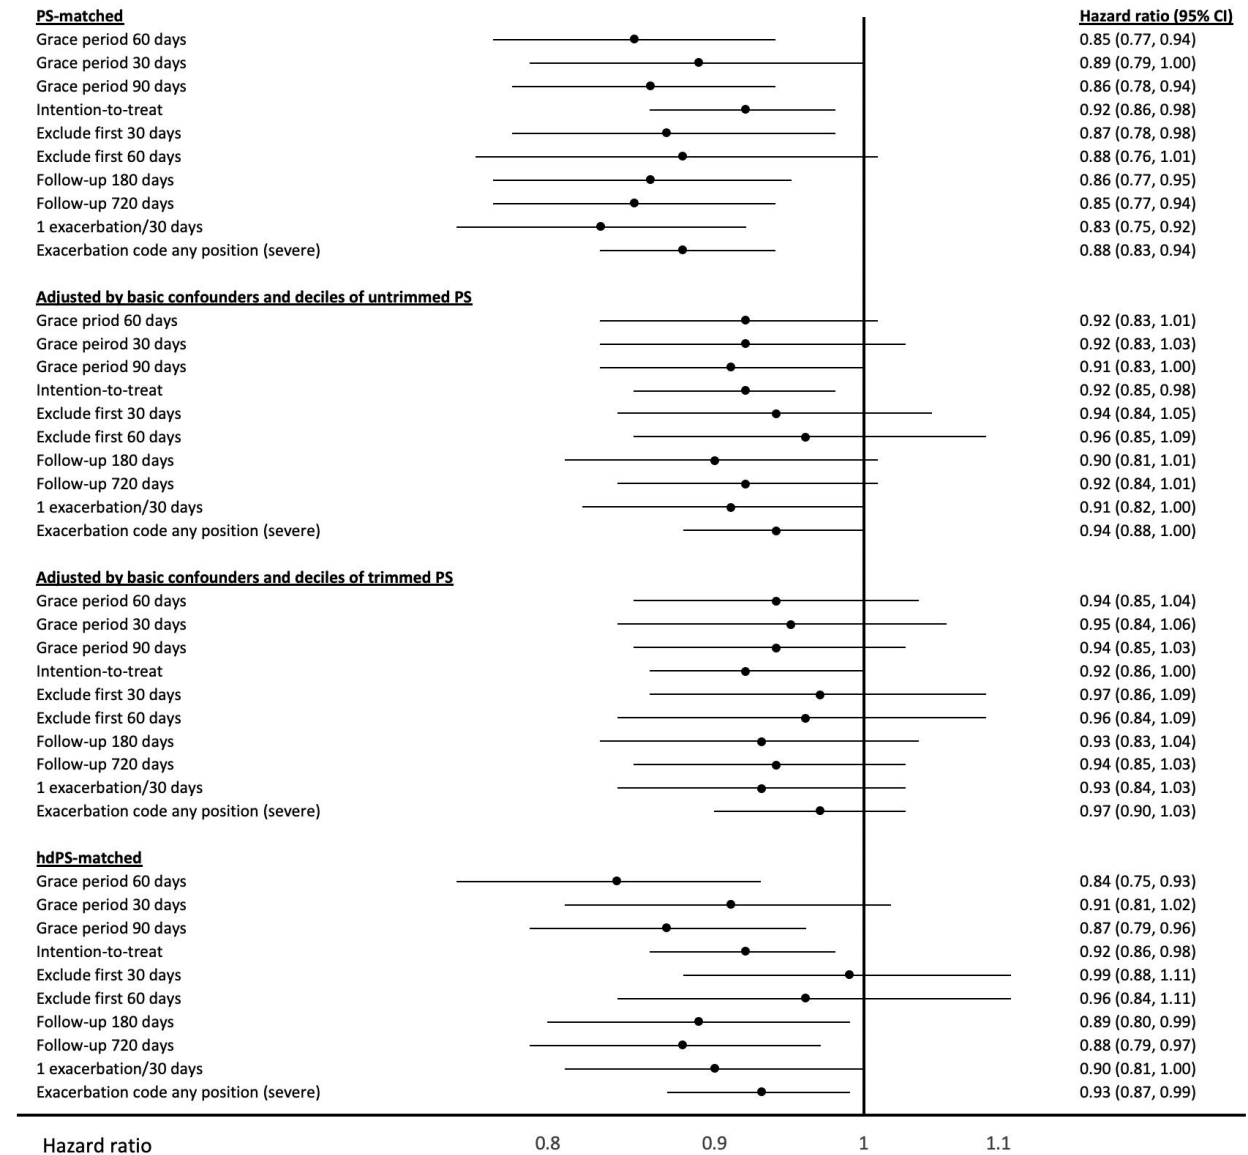

CI: confidence interval; PS: propensity score; hdPS: high-dimensional propensity score.

**eFigure 6. Sensitivity Analysis for Subgroup Comparison of First Moderate or Severe COPD Exacerbation Based on Eosinophil Level**

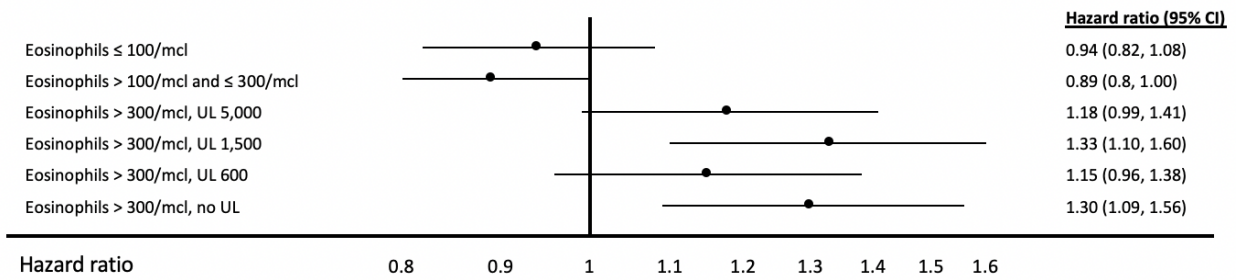

CI: confidence interval; mcl: microliter; UL: upper limit.



**eFigure 7. Subgroup Analysis for the Incidence of First Pneumonia Hospitalization**

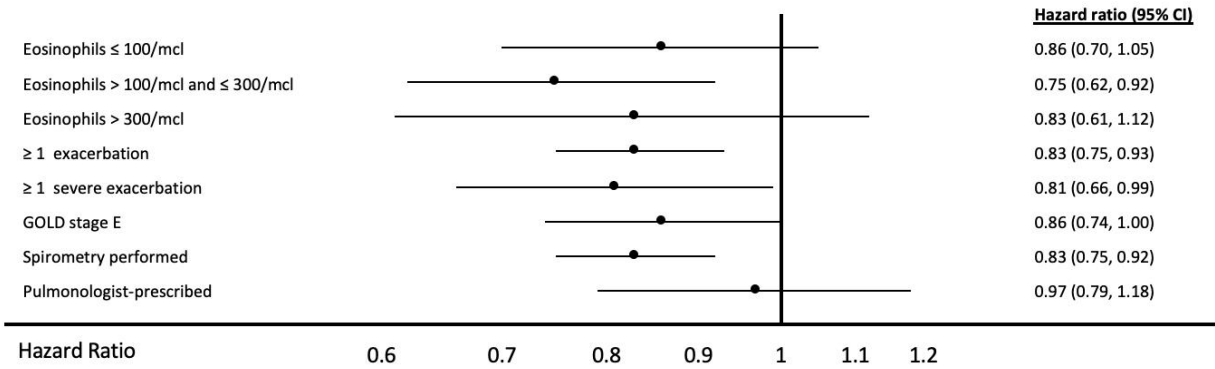

CI: confidence interval; mcl: microliter; GOLD: Global Initiative for Chronic Obstructive Lung Disease.

**eFigure 8. Incidence of first Moderate or Severe COPD Exacerbation by Type of ICS-LABA**

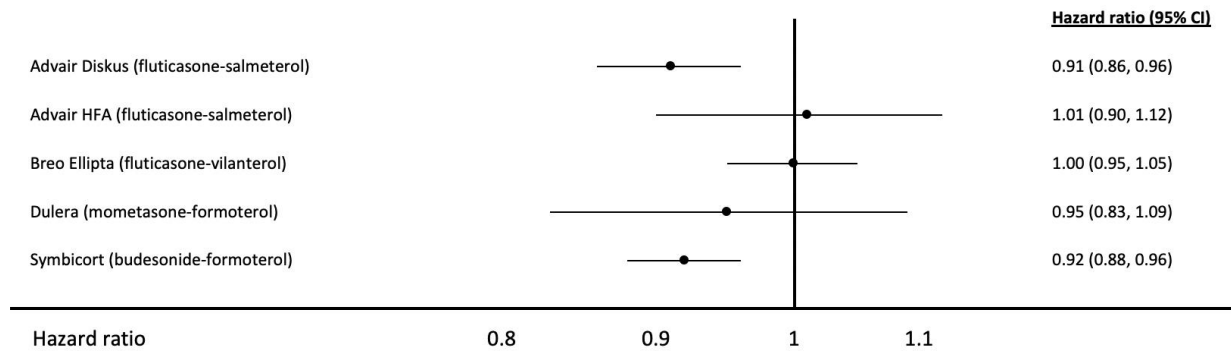

CI: confidence interval.

Inhalers with low utilization, including AirDuo Respiclick (fluticasone-salmeterol) and Wixela Inhub (fluticasone-salmeterol), were excluded from our analysis.

**eFigure 9. Incidence of First Pneumonia Hospitalization by Type of ICS-LABA**

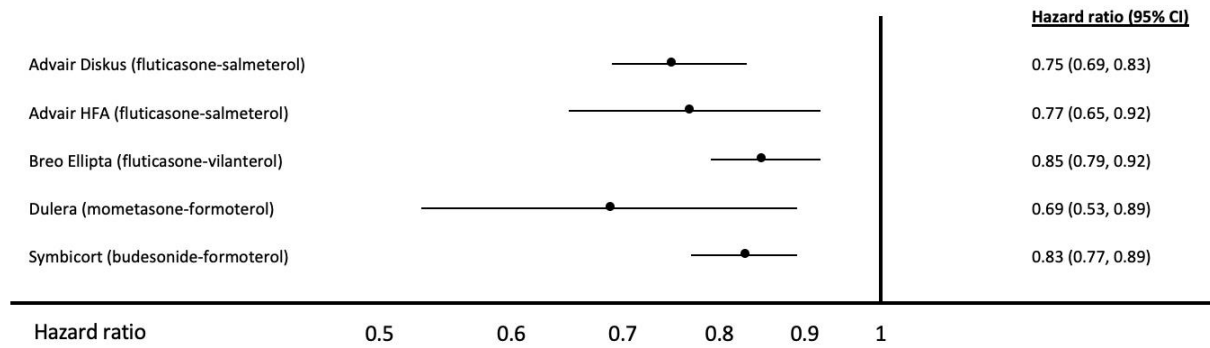

CI: confidence interval.

Inhalers with low utilization, including AirDuo Respiclick (fluticasone-salmeterol) and Wixela Inhub (fluticasone-salmeterol), were excluded from our analysis.

## eReferences

1. Global Initiative on Chronic Obstructive Lung Disease. Global Strategy for the Diagnosis, Management, and Prevention of Chronic Obstructive Pulmonary Disease: 2021 Report. Available from: [https://goldcopd.org/wp-content/uploads/2020/11/GOLD-REPORT-2021-v1.1-25Nov20\\_WMV.pdf](https://goldcopd.org/wp-content/uploads/2020/11/GOLD-REPORT-2021-v1.1-25Nov20_WMV.pdf). Accessed January 23, 2023.
2. Global Initiative on Chronic Obstructive Lung Disease. Global Strategy for the Diagnosis, Management, and Prevention of Chronic Obstructive Pulmonary Disease: 2023 Report. Available from: [https://goldcopd.org/wp-content/uploads/2023/01/GOLD-2023-ver-1.2-7Jan2023\\_WMV.pdf](https://goldcopd.org/wp-content/uploads/2023/01/GOLD-2023-ver-1.2-7Jan2023_WMV.pdf). Accessed January 23, 2023.
3. Wedzicha JA, Banerji D, Chapman KR, et al. Indacaterol-Glycopyrronium versus Salmeterol-Fluticasone for COPD. *N Engl J Med*. 2016;374(23):2222-34.
4. Schneeweiss S, Rassen JA, Glynn RJ, Avorn J, Mogun H, Brookhart MA. High-dimensional propensity score adjustment in studies of treatment effects using health care claims data. *Epidemiology*. 2009;20(4):512-22.
5. Rassen JA, Schneeweiss S. Using high-dimensional propensity scores to automate confounding control in a distributed medical product safety surveillance system. *Pharmacoepidemiol Drug Saf*. 2012;21 Suppl 1:41-9.
6. Schneeweiss S. Automated data-adaptive analytics for electronic healthcare data to study causal treatment effects. *Clin Epidemiol*. 2018;10:771-788.
7. Rothnie KJ, Mullerova H, Hurst JR, et al. Validation of the Recording of Acute Exacerbations of COPD in UK Primary Care Electronic Healthcare Records. *PLoS One*. 2016;11(3):e0151357.

8. Stein BD, Bautista A, Schumock GT, et al. The validity of International Classification of Diseases, Ninth Revision, Clinical Modification diagnosis codes for identifying patients hospitalized for COPD exacerbations. *Chest*. 2012;141(1):87-93.
9. Kern DM, Davis J, Williams SA, et al. Validation of an administrative claims-based diagnostic code for pneumonia in a US-based commercially insured COPD population. *Int J Chron Obstruct Pulmon Dis*. 2015;10:1417-25.
10. Lipson DA, Barnhart F, Brealey N, et al. Once-Daily Single-Inhaler Triple versus Dual Therapy in Patients with COPD. *N Engl J Med*. 2018;378(18):1671-1680.
11. Rabe KF, Martinez FJ, Ferguson GT, et al. Triple Inhaled Therapy at Two Glucocorticoid Doses in Moderate-to-Very-Severe COPD. *N Engl J Med*. 2020;383(1):35-48.
12. Wedzicha JAEC-C, Miravittles M, Hurst JR, et al. Management of COPD exacerbations: a European Respiratory Society/American Thoracic Society guideline. *Eur Respir J*. 2017;49(3).
13. Stevermer JJ, Fisher L, Lin KW, et al. Pharmacologic Management of COPD Exacerbations: A Clinical Practice Guideline from the AAFP. *Am Fam Physician*. 2021;104(1):Online.
14. Labaki WW, Rosenberg SR. Chronic Obstructive Pulmonary Disease. *Ann Intern Med*. 2020;173(3):ITC17-ITC32.
15. National Institute for Health and Care Excellence. Chronic obstructive pulmonary disease (acute exacerbation): antimicrobial prescribing. <https://www.nice.org.uk/guidance/ng114/chapter/Recommendations#choice-of-antibiotic>. Accessed January 20, 2022.

16. Auwaerter PG. Exacerbations of Chronic Obstructive Pulmonary Disease (COPD). [https://www.hopkinsguides.com/hopkins/view/Johns\\_Hopkins\\_ABX\\_Guide/540124/all/Exacerbations\\_of\\_Chronic\\_Obstructive\\_Pulmonary\\_Disease\\_\\_COPD\\_](https://www.hopkinsguides.com/hopkins/view/Johns_Hopkins_ABX_Guide/540124/all/Exacerbations_of_Chronic_Obstructive_Pulmonary_Disease__COPD_). Accessed January 20, 2022.
17. Sethi S, Murphy TF. Management of infection in exacerbations of chronic obstructive pulmonary disease. *UpToDate*. Topic last updated January 23, 2020.
18. Vollenweider DJ, Frei A, Steurer-Stey CA, Garcia-Aymerich J, Puhan MA. Antibiotics for exacerbations of chronic obstructive pulmonary disease. *Cochrane Database Syst Rev*. 2018;10:CD010257.
19. Miravittles M, Kruesmann F, Haverstock D, Perroncel R, Choudhri SH, Arvis P. Sputum colour and bacteria in chronic bronchitis exacerbations: a pooled analysis. *Eur Respir J*. 2012;39(6):1354-60.
20. Quon BS, Gan WQ, Sin DD. Contemporary management of acute exacerbations of COPD: a systematic review and metaanalysis. *Chest*. 2008;133(3):756-66.
21. Puhan MA, Vollenweider D, Latshang T, Steurer J, Steurer-Stey C. Exacerbations of chronic obstructive pulmonary disease: when are antibiotics indicated? A systematic review. *Respir Res*. 2007;8:30.
22. Dobler CC, Morrow AS, Beuschel B, et al. Pharmacologic Therapies in Patients With Exacerbation of Chronic Obstructive Pulmonary Disease: A Systematic Review With Meta-analysis. *Ann Intern Med*. 2020;172(6):413-422.
23. Dobler CC, Morrow AS, Farah MH, et al. Pharmacologic and Nonpharmacologic Therapies in Adult Patients With Exacerbation of COPD: A Systematic Review. 2019.

AHRQ Comparative Effectiveness Reviews.

<https://effectivehealthcare.ahrq.gov/products/copd/research>. Accessed January 20, 2022.

24. Siempos, II, Dimopoulos G, Korbila IP, Manta K, Falagas ME. Macrolides, quinolones and amoxicillin/clavulanate for chronic bronchitis: a meta-analysis. *Eur Respir J*. Jun 2007;29(6):1127-37.
25. Dimopoulos G, Siempos, II, Korbila IP, Manta KG, Falagas ME. Comparison of first-line with second-line antibiotics for acute exacerbations of chronic bronchitis: a metaanalysis of randomized controlled trials. *Chest*. 2007;132(2):447-55.
26. Korbila IP, Manta KG, Siempos, II, Dimopoulos G, Falagas ME. Penicillins vs trimethoprim-based regimens for acute bacterial exacerbations of chronic bronchitis: meta-analysis of randomized controlled trials. *Can Fam Physician*. Jan 2009;55(1):60-7.
27. IBM Micromedex. Subscription required. Accessed January 20, 2022.
28. Schneeweiss S, Rassen JA, Brown JS, et al. Graphical Depiction of Longitudinal Study Designs in Health Care Databases. *Ann Intern Med*. 2019;170(6):398-406.
