# Supplementary material
Source: PubMed Central journal article supplement (PMC10203971)
Supplement: jamainternmed-e231245-s002.pdf [file jamainternmed-e231245-s002.pdf]

## Data Sharing Statement

Feldman. Chronic Obstructive Pulmonary Disease Exacerbations and Pneumonia Hospitalizations Among New Users of Combination Maintenance Inhalers. *JAMA Intern Med.* Published May 22, 2023. doi:10.1001/jamainternmed.2023.1245

### Data

**Data available:** Yes

**Data types:** Other (please specify)

**Additional Information:** De-identified, summary level patient data

**How to access data:** De-identified, summary level patient data will be available with the authors upon request.

**When available:** With publication

### Supporting Documents

**Document types:** None

### Additional Information

**Who can access the data:** Researchers whose proposed use of the data has been approved.

**Types of analyses:** For research purposes.

**Mechanisms of data availability:** After approval of a proposal
